# Supplementary material for: Anhydrous proton conduction in self-assembled and disassembled ionic molecules
Source: Royal Society of Chemistry journal article supplement (doi:10.1039/c8ta00390d), 2018-01-01
Supplement: c8ta00390d1.pdf [file c8ta00390d1.pdf]

Table 1 Anhydrous proton conductivity and the activation energies ( $E_a$ ) of compounds **6a-e**

| Compound | Proton conductivity               | Activation energy [ $E_a$ ] |
|----------|-----------------------------------|-----------------------------|
| 6a       | $8 \times 10^{-7}$ S/cm at 80 °C  | 0.34 eV                     |
| 6b       | $9 \times 10^{-3}$ S/cm at 180 °C | 0.11 eV                     |
| 6c       | $7 \times 10^{-6}$ S/cm at 120 °C | 0.302 eV                    |
| 6d       | $8 \times 10^{-6}$ S/cm at 140 °C | 2.11 eV                     |
| 6e       | $8 \times 10^{-2}$ S/cm at 140 °C | 0.09 eV                     |

Table 2 Phase transition and ionic conductivity of compounds **6a-e**

| Compound | Col <sub>h</sub> | Conductivity <sup>a</sup> | Iso    |
|----------|------------------|---------------------------|--------|
|          |                  | [S/cm]                    |        |
| 6a       | 25 °C            | $2.5 \times 10^{-9}$      | 65 °C  |
| 6b       | -                | $5.5 \times 10^{-3}$      | -      |
| 6c       | -                | $1.5 \times 10^{-9}$      | -      |
| 6d       | 85 °C            | $2.4 \times 10^{-11}$     | 130 °C |
| 6e       | 35 °C            | $5.5 \times 10^{-2}$      | 140 °C |

<sup>a</sup>) Measured under N<sub>2</sub> atmosphere

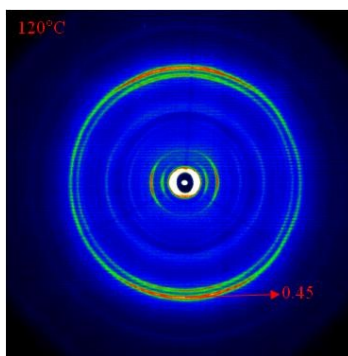

Figure 1 2DWAXS Diffractogram for compound 6d done at 120 °C. The significantly reduced scattering patterns indicates disruption of columns upon heating the sample
